# 1 Homologous Recombination as an Evolutionary Force in 2 African Swine Fever Viruses

3

4 Zhaozhong Zhu<sup>1,#</sup>, Chao-Ting Xiao<sup>1,#</sup>, Yunshi Fan<sup>1</sup>, Zena Cai<sup>1</sup>, Congyu Lu<sup>1</sup>, Gaihua  
5 Zhang<sup>2</sup>, Taijiao Jiang<sup>3,4</sup>, Yongjun Tan<sup>1</sup>, Yousong Peng<sup>1,\*</sup>

6

7 <sup>1</sup> College of Biology, Hunan University, Changsha, China

8 <sup>2</sup> College of Life Sciences, Hunan Normal University, Changsha 410081, China

9 <sup>3</sup> Center of System Medicine, Institute of Basic Medical Sciences, Chinese Academy  
10 of Medical Sciences & Peking Union Medical College, Beijing, China

11 <sup>4</sup> Suzhou Institute of Systems Medicine, Suzhou, China

12 # These authors contributed equally to this work

13 \* To whom correspondence should be addressed. Email: [pys2013@hnu.edu.cn](mailto:pys2013@hnu.edu.cn)

14

15

## 16 **Abstract**

17 Recent outbreaks of African swine fever virus (ASFV) in China severely  
18 influenced the swine industry of the country. Currently, there is no  
19 effective vaccine or drugs against ASFVs. How to effectively control the  
20 virus is challenging. In this study, we have analyzed all the publicly  
21 available ASFV genomes and demonstrated that there was a large genetic  
22 diversity of ASFV genomes. Interestingly, the genetic diversity was

23 mainly caused by extensive genomic insertions and/or deletions (indels)  
24 instead of the point mutations. The genomic diversity of the virus resulted  
25 in proteome diversity. Over 250 types of proteins were inferred from the  
26 ASFV genomes, among which only 144 were observed in all analyzed  
27 viruses. Further analyses showed that the homologous recombination may  
28 contribute much to the indels, as supported by significant associations  
29 between the occurrence of extensive recombination events and the indels  
30 in the ASFV genomes. Repeated elements of dozens of nucleotides in  
31 length were observed to widely distribute and cluster in the adjacent  
32 positions of ASFV genomes, which may facilitate the occurrence of  
33 homologous recombination. Moreover, two enzymes, which were  
34 possibly related to the homologous recombination, i.e., a Lambda-like  
35 exonuclease with a YqaJ-like viral recombinase domain, and a DNA  
36 topoisomerase II, were found to be conservative in all the analyzed  
37 ASFVs. This work highlighted the importance of the homologous  
38 recombination in the evolution of the ASFVs, and helped with the  
39 strategy development of the prevention and control of the virus.

40

41

## 42 **Introduction**

43 African swine fever virus (ASFV), the causative agent of African swine  
44 fever (ASF), is a complex, large, icosahedral multi-enveloped DNA virus.

45 It is classified as the only member in the family *Asfarviridae*<sup>1,2</sup>. The  
46 genome of the virus belongs to double-stranded DNA, with the size  
47 ranging from 170 kb to 190 kb<sup>3</sup>. ASFV mainly infect suids and soft ticks.  
48 The suids include domestic pigs and wild boars, and were reported as the  
49 natural hosts of the virus<sup>4,5</sup>. ASFV was firstly discovered in Kenya in  
50 1921<sup>6</sup>. It remained restricted in Africa till 1957, when it was reported in  
51 Spain and Portugal. Up to now, the virus has caused ASF outbreaks in  
52 more than fifty countries in Africa, Europe, Asia, and South America<sup>4</sup>.  
53 The latest reports showed that the virus has caused outbreaks in more  
54 than fifteen provinces in China<sup>7,8</sup>. Because of the high lethality of ASFV  
55 in domestic pigs, the most commonly used strategies to control the virus  
56 were the massive culling campaigns and the restriction of pig movement<sup>5</sup>.  
57 Both strategies have resulted in a huge economic loss for pig industry and  
58 affected people's livelihoods. Unfortunately, currently there is no  
59 available effective vaccine against ASFVs.

60

61 Many efforts have been devoted to developing the vaccine for the ASFV  
62 <sup>1,5,9-11</sup>, however, most of these attempts failed. One of the most important  
63 reasons was the complex composition of the antigenic proteins<sup>5,12</sup>.  
64 Previous reports showed that p72, p30, and p54 were the three important  
65 antigenic proteins during the infection of ASFVs, but the immunity  
66 against them could only provide a partial protection<sup>12,13</sup>. Many other

67 proteins or other factors such as phospholipid composition may also  
68 influence the antigen of the virus <sup>12</sup>. Therefore, it is necessary to  
69 understand the mechanisms of the antigen diversity of the ASFV virus <sup>1</sup>.  
70  
71 The genetic diversity of ASFVs has been investigated in many studies.  
72 The ASFV genome encodes over 150 proteins, including viral enzymes,  
73 viral transcription and replication-related proteins, structural proteins,  
74 other proteins involved in the virus assembly, the evading of host defense  
75 systems and the modulation of host cell function, etc <sup>3,14,15</sup>. For example,  
76 the transcription of the virus is independent on the host RNA polymerase  
77 because the virus contains relevant enzymes and factors <sup>3</sup>. The viral  
78 genome contains a conservative central region of about 125 kb and two  
79 variable ends, which results in the variable size of the genome <sup>3,16,17</sup>.  
80 There are significant variations among the ASFV genomes due to the  
81 genomic insertion or deletion, such as the deletion of the multigene  
82 family (MGF) members <sup>3</sup>. Although much progress have been made on  
83 genetic diversity of the virus, the extent and mechanisms are still not  
84 clear. Besides, most of these studies either only investigated the genetic  
85 diversity of some common genes, such as p72 and p54 <sup>18,19</sup>, or only used  
86 one or several isolate genomes <sup>3,16,17</sup>. The number of discovered viral  
87 genomes has increased rapidly as the development of DNA sequencing  
88 technology. Therefore, a comprehensive study on the genetic diversity of

89 ASFVs is necessary.

90

91 Homologous recombination, which has been reported to occur in several  
92 groups of viruses<sup>20-23</sup>, such as herpesvirus, retroviruses, and  
93 coronaviruses, has played an important role in viral evolution<sup>21</sup>. A few  
94 studies on several ASFV genes have suggested the occurrence of  
95 homologous recombination in the evolution of ASFVs<sup>3,18</sup>. However, a  
96 comprehensive study on the homologous recombination in ASFV at the  
97 genomic scale is lacking, and the role of the recombination on the genetic  
98 diversity and the evolution of the virus is still unknown. In this study, we  
99 have systematically investigated the genomic diversity and the  
100 homologous recombination of ASFVs based on the analysis on all the  
101 publicly available ASFV genomes. The results demonstrated that the  
102 homologous recombination contributed much to the genetic diversity of  
103 ASFVs. This work would help to understand the evolution of the ASFV  
104 and thus facilitate the prevention and control of the virus.

105

## 106 **Results**

### 107 *1 ASFV genomes*

108 A total of 36 genome sequences of ASFVs were obtained from the NCBI  
109 GenBank database, which were listed in Table S1. They were mainly  
110 isolated from Africa and Europe during the years from 1950 to 2017. The

111 size of the ASFV genomes ranged from 170,101 bp to 193,886 bp,  
112 averaged at 185,800 bp. The viral isolate Kenya50 had the largest size,  
113 while the isolate BA71V had the smallest size. No increasing or  
114 decreasing trend in the genome size was observed from 1950 to 2017  
115 (Figure 1A), suggesting the dynamic changes of the viral genomes.

116

## 117 ***2 Genomic diversity of ASFVs***

118 Pairwise comparisons between ASFV genomes were conducted after the  
119 genome alignment. The average genomic difference between viruses was  
120 24,570 bp, which accounts for more than 10% of the genome.

121 Interestingly, the genomic differences caused by the insertions and  
122 deletions (indels) were much more significant than those caused by the  
123 point mutations (Figure 1B & Figure S1) in most cases. For example,  
124 there were 31,833 bp differences between virus Mkuzi79 and BA71V, 78%  
125 of which were caused by indels.

126 The size and position of indels in ASFV genomes were also analyzed. 70%  
127 of indels were no longer than 10 bp, and about 10% of indels were 50 bp  
128 or longer (Figure S2). The occurrence of indels was much more frequent  
129 in both ends of the genome, especially in the 5' end (Figure 1C). Besides,  
130 the size of indels in both ends was also much larger than that in the  
131 middle region. Large indels with over 50 bp (above the blue line in Figure  
132 1C) were mostly observed in both ends. It should be noted that the

133 variation to some extent was observed in the middle region (marked in  
134 black arrow), which were considered to be conservative in previous  
135 reports.

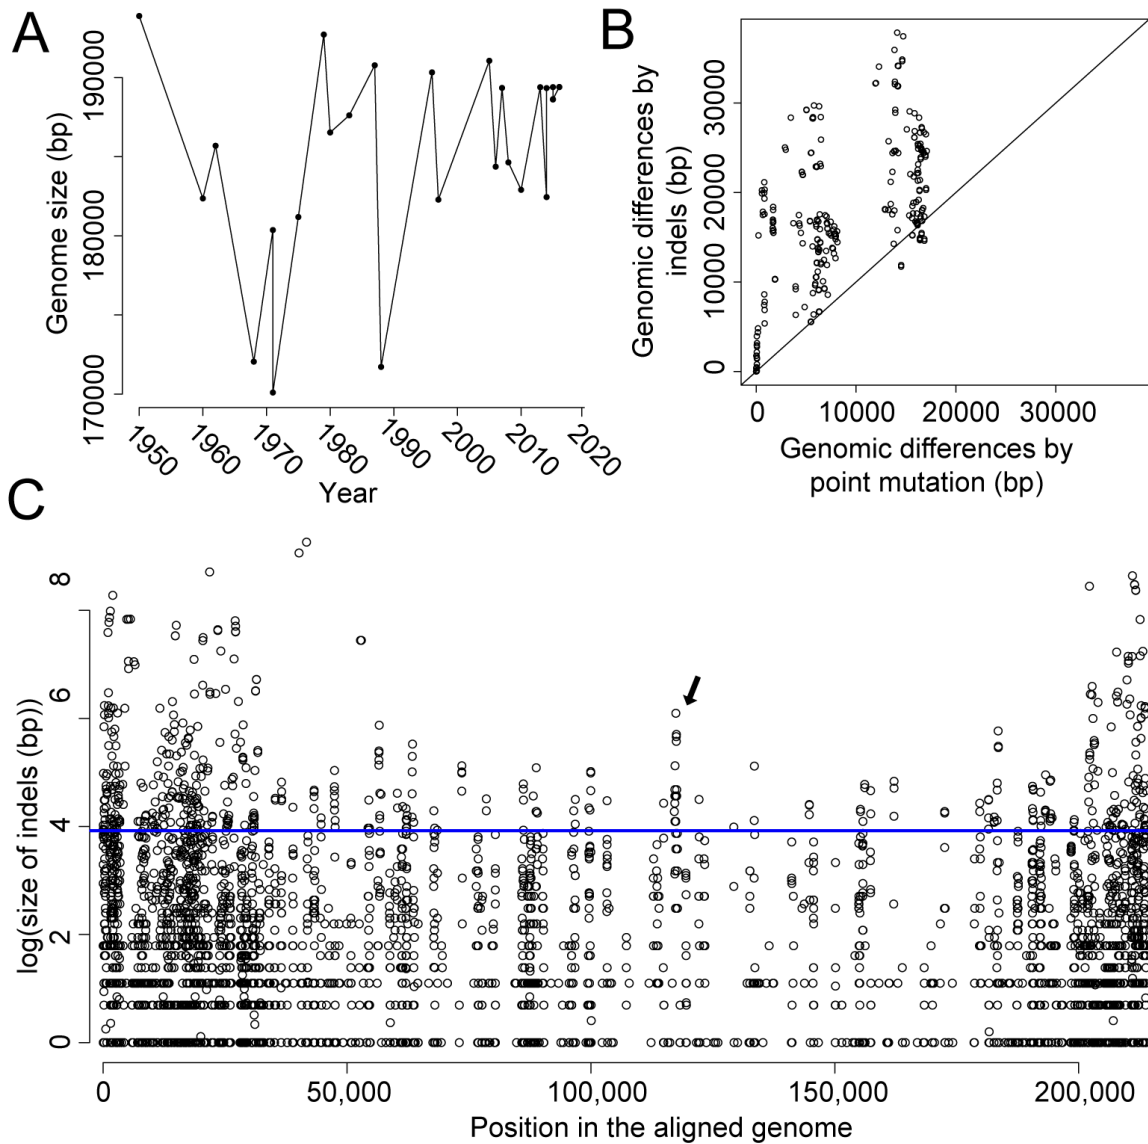

136

137

138 **Figure 1.** Genomic differences between ASFV genomes. (A) The  
139 variation of genome size along the isolation time of the virus. (B)  
140 Genomic differences caused by point mutations and indels. (C) The size  
141 and location of indels along the aligned genomes. For clarity, the natural

142 logarithm of the indel size was used. Position for an indel is defined as  
143 the middle position of the indel. The average size was used if more than  
144 one indel was found in the position. The blue line refers to indel size of  
145 50 bp.

146

### 147 ***3 Proteome diversity of ASFV***

148 Genomic diversity could lead to proteome diversity. Therefore, the  
149 proteome diversity of ASFVs was further analyzed. Firstly, the candidate  
150 proteins encoded by ASFV genomes were inferred (Materials and  
151 Methods) (Table S2). The plus strand encoded 95-126 proteins, with an  
152 average of 109 proteins; the minus strand encoded 106-128 proteins, with  
153 an average of 118 proteins. Considering both the plus and minus strands,  
154 the ASFV genome encoded 205-254 proteins, with an average of 227  
155 proteins. The viral isolate Russia14 encoded most proteins, although the  
156 size of this genome was not the largest. The ratio of coding region in each  
157 genome ranged from 88% to 91%.

158

159 Furthermore, the ortholog or paralog groups based on sequence homology  
160 were identified. A total of 252 protein groups plus 28 singletons were  
161 obtained (Table S3), each of which stood for one type of protein encoded  
162 by ASFV genomes. The obtained proteins contained almost all the  
163 proteins identified in previous experiments (Table S3). Each protein



164 group included 2-99 proteins. Only 144 protein groups were observed in  
165 all 36 ASFV viruses, which could be considered as core protein sets of  
166 the virus, and were mainly encoded by both plus and minus strands in the  
167 middle regions (Figure 2). The protein groups could be further separated  
168 into seven classes by function based on previous studies (Figures 2 & S3).  
169 Only about 30% of protein groups were observed to have the known  
170 functions, including replication and transcription (in red), host cell  
171 interactions (in magenta), structure and morphogenesis (in blue), and  
172 enzymes (in yellow). Most of the above-described protein groups with the  
173 known functions belonged to the core proteins of the virus. In addition,  
174 forty protein groups belonged to “Multigene Families (MGF)” (in cyan),  
175 most of which had unknown functions. The MGFs were encoded by both  
176 ends of the genome. Besides, the remaining 146 protein groups belonged  
177 to either the class of “Proteins with unknown function” (in gray) or  
178 “Hypothetical proteins” (in black).

179

180 Analysis of the protein conservation showed that except the functional  
181 class of MGFs, the proteins in other functional classes had an average of  
182 pairwise sequence identities greater than 90% (Figure S4). The proteins  
183 in functional classes of “Other enzymes” and “Replication &  
184 transcription” were most conservative, with average pairwise sequence  
185 identities larger than 95%. Proteins of these two functional classes also

186 had the smallest ratios of dN/dS (Figure S5), suggesting strong negative  
187 selection on them. While the proteins in the functional class of MGF and  
188 “Hypothetical proteins” had the largest ratio of dN/dS. The hypothetical  
189 proteins had a median dN/dS ratio of 0.82, suggesting strong positive  
190 selection on these proteins.

191

192 Membrane proteins, which may be located in the inner or outer envelope,  
193 were observed to be distributed widely in the proteome of ASFVs  
194 (marked with asterisks in Figure 2). A total of 67 protein groups belonged  
195 to membrane proteins, including 35 in the core protein groups, such as  
196 p54 and EP402R. Among the membrane proteins, only 11 protein groups  
197 had the known functions, including 8 protein groups in the functional  
198 class of “Structural and morphogenesis”, and 1 protein group in each  
199 functional class of “Host cell interactions”, “Replication & transcription”  
200 and “Other enzymes”.

201

202 Thirty-one protein groups were observed to have paralogs (duplicated  
203 proteins) in at least one virus (colored in Figure S6). They were mostly  
204 located in both ends of the genome. Thirteen of them belonged to MGFs.  
205 In addition, two protein groups, “DP71L” and “DP96R”, belonged to the  
206 class of “Host cell interactions”. The rest protein groups belonged to  
207 either the class of “Proteins with unknown function” or “Hypothetical

208 proteins”. Most of the paralogs were clustered in adjacent positions.  
209 Exceptions were observed for some protein groups which were encoded  
210 by the first one to three thousands nucleotides in the plus and minus  
211 strands, such as the protein group “p01990-3L” (marked with black  
212 arrows in Figure S6). Further analysis showed that a segment of 200-3000  
213 bp was exactly the same in the beginning of the plus and minus strands in  
214 most viral genomes (Table S4).

215

216 Extensive insertion and deletions of proteins were observed in the  
217 proteome of ASFVs after alignment. Viruses in the adjacent positions in  
218 the phylogenetic tree tended to have similar proteomes. The number of  
219 different proteins between different viruses ranged from 1 to 84, with an  
220 average of 43, which was about one-fifth of the viral proteome. The  
221 differences of the proteome among the viruses were mainly caused by  
222 proteins of the class of “Hypothetical proteins”, “Proteins with unknown  
223 function” and “MGF” (Figure 2).

224

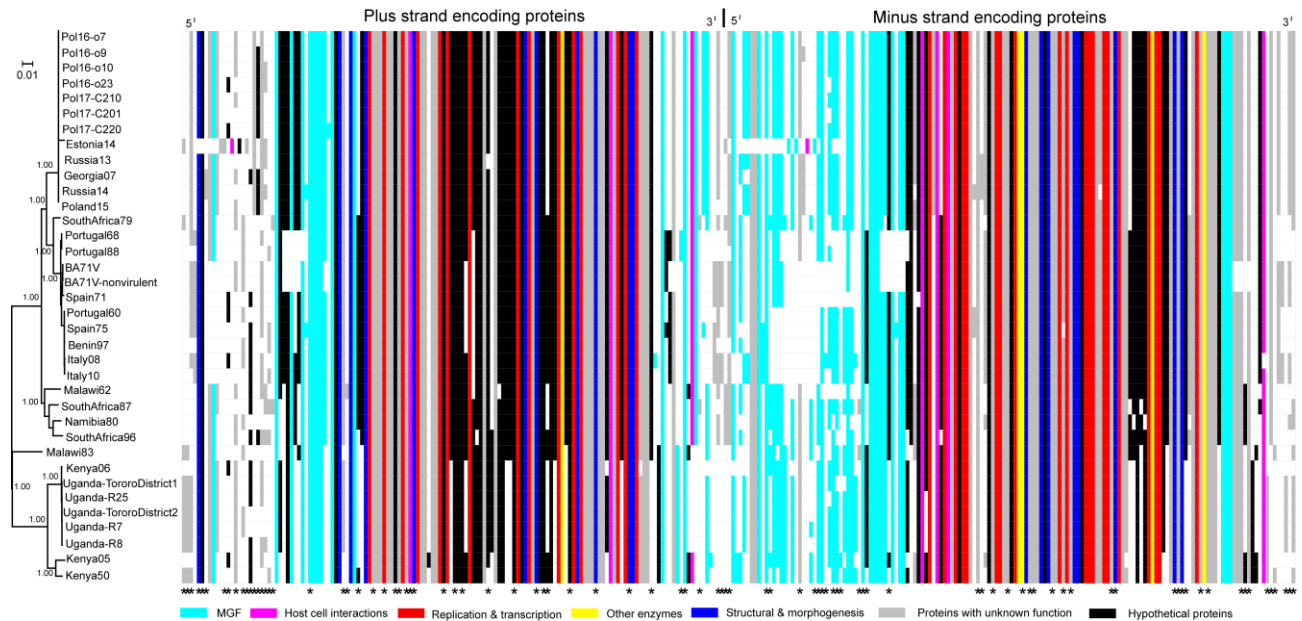

225

226 **Figure 2.** The phylogenetic tree of ASFVs and the alignment of their  
227 proteomes in plus (left side) and minus strand (right side). Each row  
228 refers to the proteome of the virus in the phylogenetic tree; each column  
229 refers to one protein group. Protein groups were colored according to  
230 their functions. “White” refers to no protein group in the virus. Asterisks  
231 in the bottom refer to membrane proteins. For clarity, the singletons were  
232 ignored in the alignment.

233

#### 234 ***4 Extensive homologous recombination in ASFV genomes***

235 As numerous indels have been revealed in the ASFV genomes, then, we  
236 investigated the mechanism of generating indels. According to the results  
237 in previous studies, three factors may contribute to the extensive indels in  
238 ASFVs: replication slippage, retrotransposition and recombination<sup>23</sup>.

239 Replication slippage mainly produced duplications of short genetic  
240 sequences and may cause short indels, but it is unlikely to generate large

241 indels observed in ASFVs. Retrotransposition can result in duplication of  
242 large genetic sequences or genes, but the location of duplicates would be  
243 randomly distributed in the genome. However, most paralogs shown in  
244 Figure S6 were clustered in adjacent positions, thus these paralogs may  
245 be not caused by retrotransposition. Besides, no retrotransposons were  
246 observed in the analyzed ASFV genomes (as described in Materials and  
247 Methods).

248

249 Finally, we investigated the role of recombination in the generation of  
250 indels in the ASFV genomes. The analyses on the recombination showed  
251 that there were a total of 103 recombination events, and each ASFV  
252 genome had 3-22 recombination events (Figure 3 & Table S5). The virus  
253 isolate SouthAfrica79 experienced the largest number of recombination  
254 events. On average, each virus experienced 11 recombination events. The  
255 sizes of recombination region ranged from 174 to 22,628 bp. The ratio of  
256 recombination region in each genome ranged from 2% to 27%. In total,  
257 the regions in the ASFV genomes involved in all recombination events  
258 covered a total of 101,569 nucleotide positions, accounting for 47% of  
259 the aligned genome. Most recombination events happened at both ends,  
260 especially at the 5' end. Interestingly, the recombination event in the  
261 aligned genomes was observed to be consistent with the ratio of the gap  
262 in the genome (the bottom of Figure 3). Almost all the recombination

263 events happened in or close to the gap-rich regions where the indels were  
264 observed. The ratios of the gaps in the recombination regions were found  
265 to be much larger than those in other regions (Figure S7). Further  
266 comparison of the number of indels in the recombination regions and  
267 other regions showed that for indels of varying length, such as those  
268 greater than 5, 10, or 50 bp, the number of indels in the recombination  
269 regions was much larger than those in other regions (Figure S8).

270

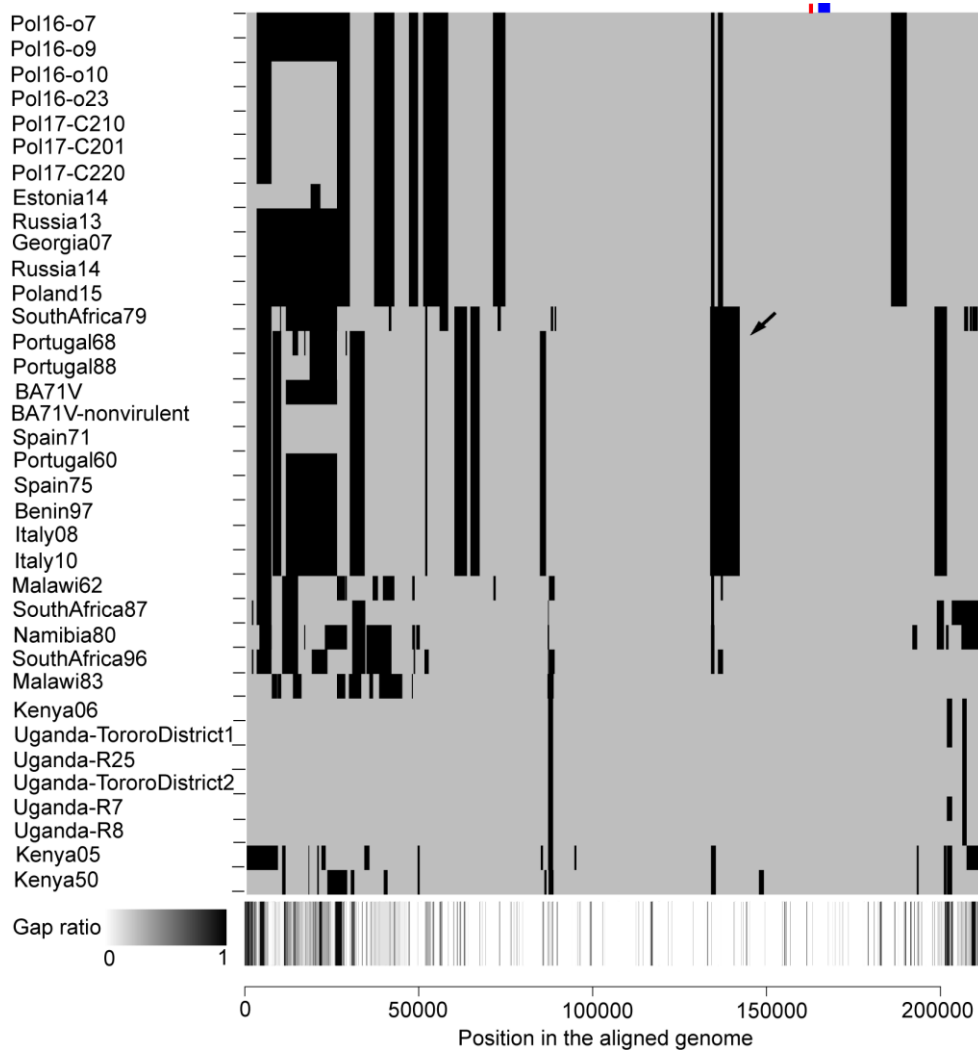

271

272

273 **Figure 3.** Recombination of ASFV genomes. The black areas indicate the  
274 recombination region for each genome. The bottom panel shows the ratio  
275 of gap in each position of the aligned genome. The panel uses the  
276 grayscale color bar at the bottom-left. The red and blue rectangles in the  
277 top-right indicate the coding region of pD345L (Lambda-like exonuclease)  
278 and P1192R (DNA topoisomerase II), respectively. The black arrow  
279 refers to the recombination event displayed in Figure 4.

280

281 Figure 4 illustrates the recombination event in 11 viral isolates (colored in  
282 red), including two viral isolates from Africa (SouthAfrica79 and  
283 Benin97) and nine viral isolates from Europe. These 11 viral isolates  
284 formed a separate lineage in the phylogenetic tree. The recombination  
285 region ranged from 133,683 to 142,222 bp, located in the central  
286 conservative region of the genome (shown by the black arrow in Figure  
287 3). In the phylogenetic tree built with genomic sequences without the  
288 recombination regions, the recombinants are the neighbors of a clade  
289 containing viruses from Eastern Europe countries (Figure 4A); while in  
290 the tree built with genomic sequences of the recombination regions, the  
291 recombinants are the descendants of Malawi62 from Africa (Figure 4B).

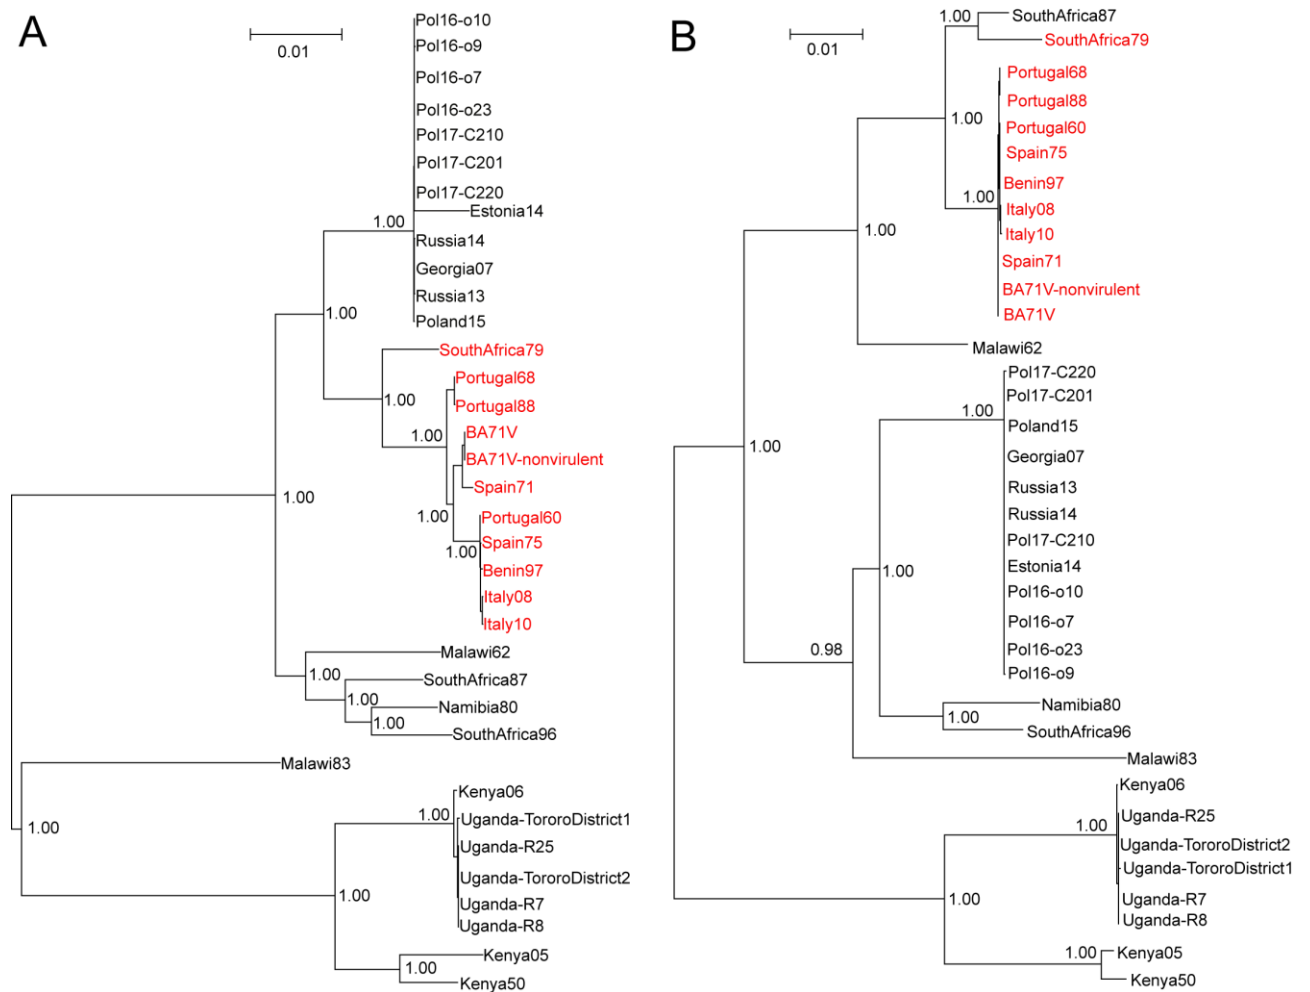

292

293 **Figure 4.** An example of recombination events in 11 ASFVs (colored in  
294 red). Figure (A) refers to the maximum-likelihood phylogenetic tree built  
295 with genome sequences without the recombination region  
296 (133,683-142,222 in the aligned genome). Figure (B) refers to the  
297 phylogenetic tree built with genome sequences of the recombination  
298 region. The numbers refer to the bootstrap values of nodes in the  
299 bootstrapping test with 100 replicates.

300

301 In addition, the indels introduced directly by the recombination were  
302 investigated. The results of comparing the sequence in the recombination



303 regions of recombinants to that in the major parent viruses showed that an  
304 average of 37% of differences were caused by the indels in all the  
305 recombination events. Further comparison on the proteins showed that in  
306 58 of 103 recombination events, there was at least one different protein  
307 encoded by the recombination region of the recombinants from that  
308 encoded by the major parent viruses.

309

310 Furthermore, the proteins involved in the recombination events were  
311 further analyzed. A total of 110 protein groups were involved in the  
312 recombination events, including 47 core protein groups and 63 variable  
313 protein groups (Table S3). 34 of 110 protein groups belonged to  
314 membrane proteins. Four protein groups of “Host cell interactions”  
315 (EP153R, A238L, DP96R and DP71L), eight protein groups of “Structure  
316 & morphogenesis” and nine protein groups of “Replication &  
317 transcription” were involved in the recombination events.

318

### 319 *5 Identification of possible recombinase and DNA topoisomerase in*

#### 320 *ASFVs*

321 Interestingly, we found a protein, named pD345L, denoted as the  
322 Lambda-like exonuclease, was possibly involved in the recombination  
323 because it contained the YqaJ-like viral recombinase domain. The protein  
324 pD345L has 345 amino acids and is encoded by the minus strand. It was

325 highly conservative in ASFVs, with an average sequence identity of 96.7%  
326 between ASFVs. Even higher level of conservation was observed in the  
327 recombinase domain of pD345L, with an average sequence identify of  
328 97.2%. Although the YqaJ-like recombinase domain was extensively  
329 distributed in Bacteria, Virus and Eukaryota, it was considered as the  
330 viral origin<sup>24</sup>. The recombinase domain in ASFV was most similar to that  
331 in two giant viruses, Pacmanvirus and Kaumoebavirus (see Materials and  
332 Methods) which were possibly distant relatives of ASFVs<sup>25,26</sup>.

333

334 Besides, topoisomerase was also reported to be related to homologous  
335 recombination. We found that a type II DNA topoisomerase, i.e., P1192R,  
336 exists in all analyzed ASFV isolates. P1192R was a protein including  
337 1192 amino acids, and was encoded by the plus strand. P1192R is also  
338 conservative in these viruses, with an average sequence identity of 98.3%  
339 between ASFVs. Although pD345L and P1192R were encoded by  
340 different strands, they were encoded by the genomic sequences in  
341 adjacent regions: the former was encoded by the sequences in the  
342 positions of 162,236-163,273 (colored in red in Figure 3), while the latter  
343 was encoded by the sequences in the positions of 164,743-168,319  
344 (colored in blue in Figure 3). Both enzymes were not involved in any  
345 recombination events. The phylogenetic trees for proteins pD345L and  
346 P1192R were similar to the tree built with the whole genome (Figure S9).

347

## 348 ***6 An abundance of repeated elements in ASFV genomes***

349 Repeated elements could facilitate the homologous recombination. In this  
350 study, lots of repeated elements ranging from 5-100 bp were identified,  
351 and then the distribution of the repeated elements in the ASFV genomes  
352 was analyzed. As shown in Figure S10, the number of repeated elements  
353 in ASFV genomes decreased monotonously as the size of elements  
354 increased. Then, the distances between adjacent elements for a given  
355 repeated element was investigated (Figure 5A). As the size of the  
356 elements increased from 5 to 10, the average distance between the  
357 adjacent elements also increased because the number of repeated  
358 elements in the genome decreased. Interestingly, the average distance  
359 decreased as the size of the elements increased from 11 to 23; it reached  
360 to the minimum (136 bp) when the size was 23; then the distance kept  
361 unchanged as the size increased from 23 to 46; finally, it increased as the  
362 size of repeated element increased from 47 to 100. It should be noted that  
363 the average distance was still less than 400 bp even for the repeated  
364 elements of 100 bp. These phenomena suggested that the repeated  
365 elements of 11 bp or larger tended to cluster in the genome, especially for  
366 those of 23-46 bp.

367 For example, when the size of elements was 30 bp, each genome had a  
368 median of 427 types of elements which repeated at least two times in the

369 genome. Some elements appeared for over ten times in the genome, such  
370 as the element “AGGCGTTAAACATTAAAATTATTACTACTG” in  
371 the viral strain BA71V. The region covered by repeated elements  
372 accounted for 1%-3% of the genome in ASFVs. The distance between  
373 repeated elements was analyzed and demonstrated to have a median  
374 distance of 136 bp, suggesting they tend to cluster in adjacent regions.  
375 Figure 5B shows the distribution of repeated elements in the aligned  
376 genome. Most repeated elements were located at both ends of the genome.  
377 Besides, there were two clusters of repeated elements in the positions of  
378 around 55,000 bp and 120,000 bp (marked by black arrows), respectively.  
379  
380 Finally, the contribution of repeated elements to the recombination was  
381 investigated. For elements of 10 or more nucleotides, the number of  
382 repeated elements in the windows (2000-10,000bp in length) including  
383 the recombination was significantly larger than those without the  
384 recombination (Table S6). Figure 5C shows the comparison of the  
385 number of repeated elements (15 bp in length) in the windows of 10,000  
386 bp with and without the recombination in viral genomes. The windows  
387 including the recombination had a mean of 194 repeated elements, which  
388 was twice of that in the windows without the recombination.

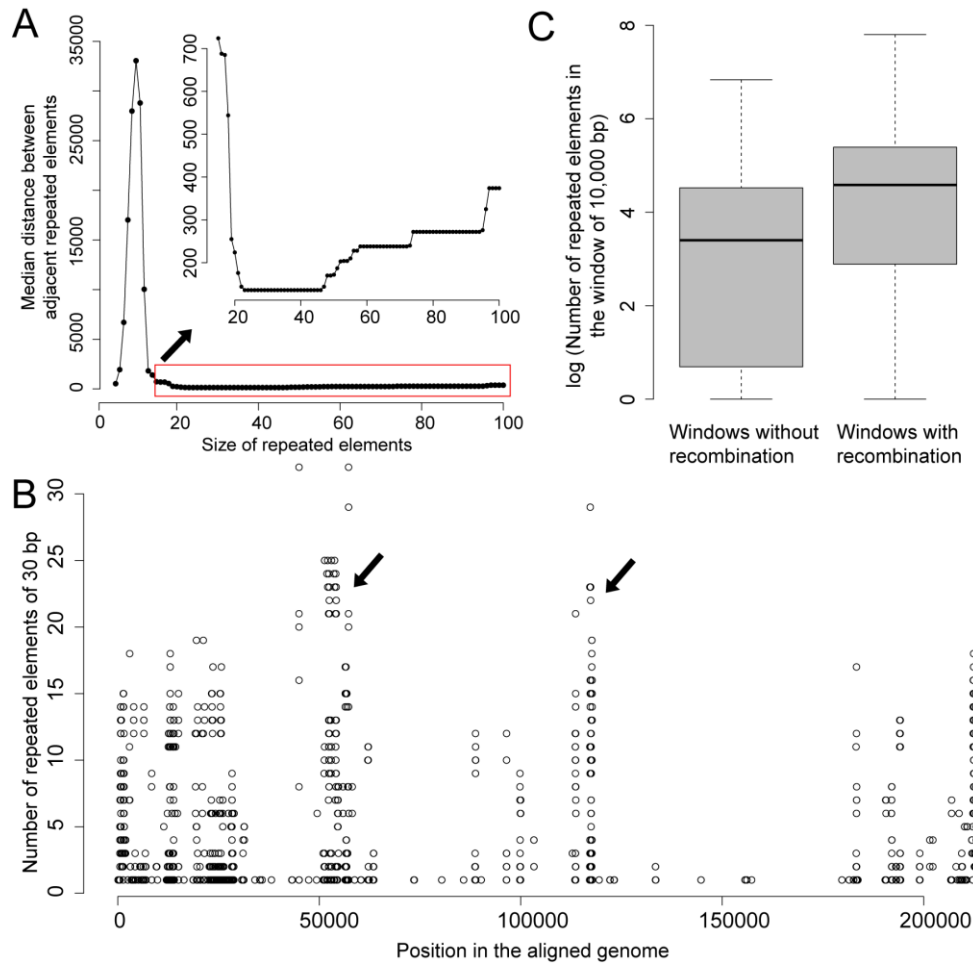

389

390 **Figure 5.** Distribution of the repeated elements. (A) The median distance  
391 between adjacent repeated elements versus the size of repeated elements.  
392 (B) Number of the repeated elements with the size of 30 bp observed in  
393 each genomic position. (C) Comparison of the number of repeated  
394 elements (15 bp in length) in the window of 10,000 bp with and without  
395 the recombination in viral genomes. For clarity, the natural logarithm of  
396 the number of repeated elements was used.

397

## 398 Discussion

399 This work systematically analyzed the genetic diversity of ASFVs. The

400 large genome of the virus enabled the encoding of an abundance of  
401 proteins. Each of the functions of the virus in its life circle could be  
402 accomplished by multiple proteins. For example, 35, 19, and 7 protein  
403 groups were involved in DNA replication and transcription, structure and  
404 morphogenesis, and host cell interactions, respectively. On one hand, this  
405 multiple protein mechanism could facilitate the efficient control of the  
406 host cell by protein-protein interactions, such as inhibiting the  
407 transcriptional activation of host immunomodulatory by A238L<sup>3</sup> and  
408 inhibiting Toll-like receptor 3 signaling pathways by I329L<sup>27</sup>; on the  
409 other hand, this mechanism could facilitate the precise regulation of the  
410 viral activities. For example, the ASFV virus was considered to contain  
411 all the enzymes and factors which were required for the transcription and  
412 post-treatment of mRNAs<sup>3</sup>.

413

414 Significant differences were observed among the different proteomes of  
415 ASFVs, which may be caused by the following two reasons: i) over 40%  
416 of the proteins were non-essential among ASFVs, and ASFVs may have  
417 variable number of these proteins; ii) there were 31 genes with  
418 replications in ASFV genomes. Diverse proteome among ASFVs may  
419 lead to diverse phenotype, such as the diversity in antigen and virulence.  
420 The diversity may result in a great challenge for the prevention and  
421 control of the virus. For example, the viruses with diverse antigens may

422 need multiple types of vaccines because the effectivity of the  
423 cross-protection on viruses may be limited.

424

425 Although lots of efforts have been devoted to developing vaccines against  
426 ASFVs<sup>1,10-12</sup>, unfortunately, most of the attempts have been unsuccessful.

427 The failure could be caused by many factors<sup>12</sup>, including the absence of  
428 neutralizing antibodies, the diverse antigen-related proteins, the

429 complexity of neutralization, etc. In this study, a total of 65 membrane  
430 proteins have been identified. Over eighty percent (80%) of the

431 membrane proteins had unknown functions, many of which may

432 contribute to the antigenic diversity of the virus. Previous studies showed

433 that immunized pigs with the baculovirus expressed hemagglutinin of

434 ASFV were protected against the viral lethal infection<sup>28</sup>. The results

435 suggested that incorporation of multiple antigens in the vaccine may

436 provide better protection. Therefore, much more efforts are needed to

437 determine the role of membrane proteins in stimulating neutralizing

438 antibodies, and to investigate the neutralization mechanisms and

439 efficiency of the antibodies.

440

441 Indels were found to have larger contribution to the genetic diversity of

442 ASFVs than the point mutations. Compared to point mutations, indels

443 could introduce a larger variation to the genome, and cause a more severe

444 damage to the genome structures, which may lead to the death of viruses.  
445 Therefore, only few indels were observed in viruses with small genomes,  
446 such as influenza viruses and hepatitis B viruses (HBV). However, it was  
447 more robust for the indels to occur inside the viruses with large genomes,  
448 such as ASFVs and poxviruses<sup>3,29</sup>, because the viruses with large  
449 genomes had lots of repeated elements and duplicated proteins (paralogs).  
450 Moreover, indels may provide a more efficient way of survival than the  
451 point mutations under the natural selection pressure, since the virus with  
452 indels could rapidly change its phenotype<sup>3,29</sup>, such as antigen, virulence,  
453 or ability of replication and transcription. For example, the deletion of  
454 some MGF genes in ASFV could reduce the viral replication or virulence,  
455 which may help with the viral infection of soft ticks<sup>3,30</sup>.

456  
457 Several factors could contribute to the indels and the gene duplications,  
458 including replication slippage, retrotransposition, recombination,  
459 aneuploidy, polyploidy, etc<sup>31</sup>. The replication slippage may introduce  
460 short indels which were widely observed in ASFV genomes, but it is  
461 unlikely to cause large indels. This study has demonstrated that the  
462 ectopic homologous recombination<sup>32</sup>, during which the segments with  
463 unequal length were exchanged (Figure 6A), may contribute much to the  
464 extensive indels observed in ASFV genomes. As a proof, significant  
465 associations were observed between the occurrence of extensive



466 recombination events and the indels. Two factors may facilitate the  
467 homologous recombination in ASFVs: firstly, a large amount of clustered  
468 repeated elements were observed in ASFV genomes (Figure 5); secondly,  
469 all the analyzed ASFVs in this study contained a possible recombinase  
470 and DNA topoisomerase, both of which were commonly observed  
471 enzymes responsible for homologous recombination. Both of enzymes  
472 were very conservative and experienced no recombination, suggesting  
473 their important roles in ASFVs. Taken together, the homologous  
474 recombination should be the effective strategy of ASFVs to generate the  
475 genetic diversity, which further leads to the diverse phenotypes, including  
476 antigen, virulence, replication and transcription ability, and the “weapons”  
477 of escaping from the host immunity (Figure 6B).

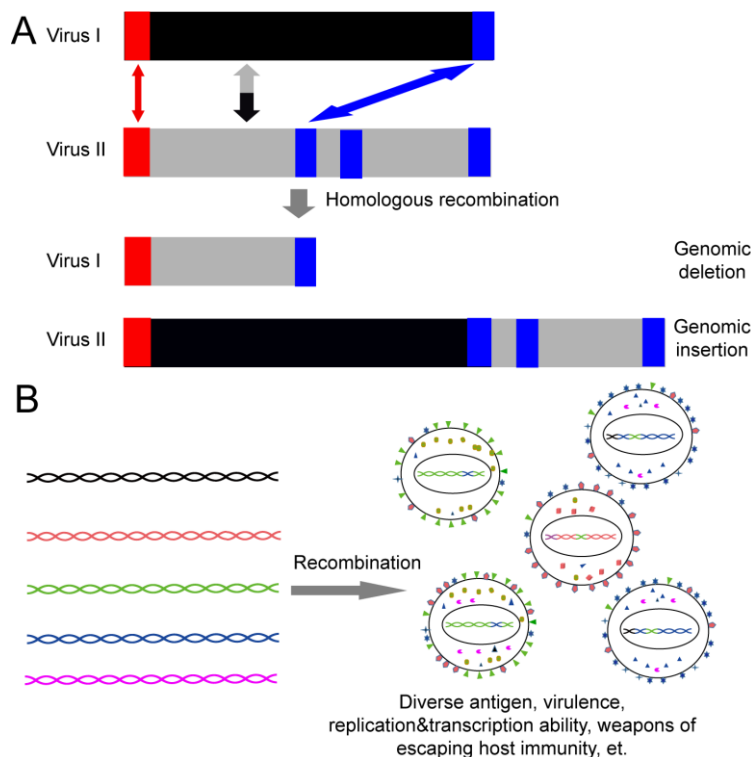

478

479 **Figure 6.** Homologous recombination leads to (A) the indels, and (B) the

480 genetic diversity of ASFVs.

481

482 There were some limitations to this study. Firstly, the number of ASFV  
483 genomes was limited, which hindered a comprehensive analysis on the  
484 evolution of ASFV genomes. Fortunately, the isolates included in this  
485 study covered a long time period from 1950 to 2017, and also covered a  
486 large area including Africa and Europe, which were the two major areas  
487 of the ASFV circulation. Thus the results based on these isolates reflect  
488 the genetic diversity of the ASFVs to a large extent. Secondly, the  
489 location and size of the indels observed in ASFV genomes may be  
490 affected by the sequence alignment algorithm. Two common methods for  
491 the alignment of ASFV genomes were used in this study. In both methods,  
492 frequent indels were observed, and the indels were demonstrated to be  
493 more responsible for the genetic diversity than the point mutations.  
494 Thirdly, the proteome of each ASFV was inferred by computational  
495 methods. All of the obtained proteins had significant homology to the  
496 proteins in the NCBI Protein database, however, most of the proteins in  
497 the NCBI Protein database were only predicted without experimental  
498 validations. Besides, functions of nearly 70% of ASFV proteins were  
499 unknown. Further experimental studies were needed to determine the  
500 proteome and the functions in ASFVs<sup>14,15</sup>. Lastly, the extensively  
501 repeated elements in ASFV genomes could facilitate the frequent

502 occurrence of recombination events. However, some of recombination  
503 events cannot be detected by the recombination detection method because  
504 of the exchange between the genomic segments with small indels. Such  
505 kinds of recombination events are difficult to detect. Increasing the  
506 sensitivity of the recombination detection method can help detect them,  
507 but may also bring false positives. Therefore, the sensitivity and  
508 specificity should be balanced in the recombination detection methods.

509

510 Overall, this work provided a systematic view of the genetic diversity of  
511 ASFVs. Extensive homologous recombination detected in this study may  
512 contribute much to the widespread indels observed in ASFV genomes,  
513 which further lead to the large genetic diversity of ASFVs. The results on  
514 the causes of the diversity of ASFVs would help with the understanding  
515 of the evolution of the virus and thus facilitate the prevention and control  
516 of ASFVs.

517

## 518 **Materials and Methods**

### 519 *1 ASFV genome and alignment*

520 All the ASFV genomic sequences with over 160, 000 bp were obtained  
521 from NCBI GenBank database on October 7, 2018<sup>33</sup>. After removing the  
522 genomic sequences derived from a patent, a total of 36 ASFV genomes  
523 were kept in the analysis. The genomic sequences were aligned by

524 MAFFT (version 7.127b)<sup>34</sup>. To ensure the robustness of the alignment,  
525 the traditional tool of CLUSTAL (version 2.1)<sup>35</sup> was also used to align  
526 these genome sequences.

527

## 528 ***2 ORF prediction***

529 To obtain the proteins encoded by the ASFV genomes, each genome  
530 sequence was searched against all the ASFV protein sequences obtained  
531 from the NCBI protein database on October 7, 2018, with the help of  
532 blastx<sup>36</sup>. All genomic regions with significant hits (e-value < 0.001) were  
533 checked using a Perl script: overlapping regions in the same coding frame  
534 were merged to obtain open reading frames (ORFs) as long as possible;  
535 regions without start codon or stop codon were extended upstream or  
536 downstream to search for the start or stop codon. Then, the genomic  
537 regions which had i) significant hit, ii) both sequence identity and query  
538 coverage percentage greater than 60%, iii) both start and stop codons, and  
539 iv) over 120 bps, were defined as the candidate ORFs. The candidate  
540 ORFs were then translated into proteins using a Perl script. The proteins,  
541 which were either completely embedded within another protein, or  
542 contained less than 40 amino acids due to early termination of translation,  
543 were removed.

544

## 545 ***3 Protein grouping***

546 All the inferred proteins of ASFVs were grouped based on sequence  
547 homology using OrthoFinder (version 2.2.7)<sup>37</sup> with the default  
548 parameters. Manual check was conducted to ensure that each protein  
549 group contains one type of protein.

550

#### 551 ***4 Calculation of the ratio of dN/dS for proteins***

552 The coding sequences of proteins in each protein group were aligned by  
553 codon according to the protein sequence alignment using a Perl script.  
554 The ratios of dN/dS between pairwise coding sequences were calculated  
555 by yn00 in PAML (version 4.1)<sup>38</sup>. The average of pairwise dN/dS ratios  
556 was calculated as the ratio of dN/dS for the protein.

557

#### 558 ***5 Alignment of ASFV proteome***

559 An ASFV proteome was defined as all the proteins encoded by the ASFV  
560 genome. Because both the plus and minus strands could encode proteins,  
561 the proteins in a proteome were separated into plus and minus proteome  
562 based on the coding strands. Proteome alignment was conducted  
563 separately for the plus and the minus proteomes. Firstly, proteins in each  
564 proteome were sorted with the order from the 5' end to the 3' end of the  
565 genome, based on the coding regions of the proteins. Then, the proteomes  
566 were aligned using a dynamic programming algorithm. Manual check  
567 was conducted to ensure that there was no mismatch of proteins in the

568 alignment.

569

## 570 ***6 Function inference and classification of ASFV proteins***

571 The name of each protein group was obtained from the names of BLAST  
572 best hit of proteins included in the protein group. To infer the function of  
573 each protein group, the longest protein sequence in each protein group  
574 was selected as the representative of the protein group. InterproScan  
575 (version 5)<sup>39</sup> was used to infer the function of the representative protein  
576 sequence. The TMHMM Server (version 2.0)<sup>40</sup> was used to predict  
577 whether the representative protein had a trans-membrane helix.

578 Membrane proteins were defined as those who had at least one  
579 trans-membrane helices. The functional classification of the proteins was  
580 adapted from Dixon's<sup>3</sup> and Alejo's<sup>15</sup> work.

581

## 582 ***7 Detection of homologous recombination events***

583 RDP (version 4)<sup>41</sup> was used to detect the recombination events in the  
584 aligned ASFV genomes. Multiple methods in RDP were used. Only the  
585 recombination events which were detected by at least two methods were  
586 used for further analysis.

587

## 588 ***8 Evolutionary analysis of YqaJ-like viral recombinase domain***

589 All viral protein sequences of the family of Yqaj (YqaJ-like viral

590 recombinase domain, ID: PF09588) were downloaded from the Pfam  
591 database<sup>42</sup> on November 21, 2018. With the help of blastp, the  
592 recombinase domain in ASFV was found to be most similar to that in two  
593 giant viruses, Pacmanvirus and Kaumoebavirus, with sequence identities  
594 equal to 0.35 and 0.30, respectively.

595

### 596 ***9 Searching for retrotransposon in ASFV genomes***

597 All retrotransposons in the databases of RepBase (Version 23.10)<sup>43</sup> and  
598 TREP<sup>44</sup> were downloaded on November 11, 2018. All ASFV genomes  
599 were searched against these retrotransposons using blastn. No hits were  
600 obtained under the e-value cutoff of 0.001.

601

### 602 ***10 Phylogenetic tree inference and visualization***

603 Maximum-likelihood phylogenetic trees were inferred using MEGA  
604 (version 5.0)<sup>45</sup> with the default values of parameters. Bootstrap analysis  
605 was conducted with 100 replicates. The phylogenetic tree was visualized  
606 using Denscrope (version 2.4)<sup>46</sup>.

607

### 608 ***11 Statistics analysis***

609 All the statistical analyses were conducted in R (version 3.2.5)<sup>47</sup>.

610

611

## 612 **Acknowledgements**

613 This work was supported by the National Key Plan for Scientific  
614 Research and Development of China (2016YFD0500300,  
615 2016YFC1200200 and 2017YFD0500104), the National Natural Science  
616 Foundation of China (31500126 and 31671371) and the Chinese  
617 Academy of Medical Sciences (2016-I2M-1-005).

618

## 619 **Competing interests**

620 The authors have declared that no competing interests exist.

621

## 622 **References**

623

- 624 1 Arias, M., Jurado, C., Gallardo, C., Fernandez-Pinero, J. & Sanchez-Vizcaino, J. M. Gaps in  
625 African swine fever: Analysis and priorities. *Transboundary and emerging diseases* **65**,  
626 235-247, doi:10.1111/tbed.12695 (2018).
- 627 2 Galindo, I. & Alonso, C. African Swine Fever Virus: A Review. *Viruses* **9**,  
628 doi:10.3390/v9050103 (2017).
- 629 3 Dixon, L. K., Chapman, D. A. G., Netherton, C. L. & Upton, C. African swine fever virus  
630 replication and genomics. *Virus research* **173**, 3-14, doi:10.1016/j.virusres.2012.10.020  
631 (2013).
- 632 4 Costard, S., Mur, L., Lubroth, J., Sanchez-Vizcaino, J. M. & Pfeiffer, D. U. Epidemiology of  
633 African swine fever virus. *Virus research* **173**, 191-197, doi:10.1016/j.virusres.2012.10.030  
634 (2013).
- 635 5 Sanchez-Cordon, P. J., Montoya, M., Reis, A. L. & Dixon, L. K. African swine fever: A  
636 re-emerging viral disease threatening the global pig industry. *Vet J* **233**, 41-48,  
637 doi:10.1016/j.tvjl.2017.12.025 (2018).
- 638 6 Arzt, J., White, W. R., Thomsen, B. V. & Brown, C. C. Agricultural Diseases on the Move  
639 Early in the Third Millennium. *Veterinary pathology* **47**, 15-27,  
640 doi:10.1177/0300985809354350 (2010).
- 641 7 World Organization for animal health. *African Swine Fever (ASF) Report N°4: October 5 - 18,*  
642 *2018,*  
643 <<http://www.oie.int/en/animal-health-in-the-world/information-on-aquatic-and-terrestrial-ani>



- 644 mal-diseases/african-swine-fever/reports-on-asf/> (2018).
- 645 8 Ge, S. Q. *et al.* Molecular Characterization of African Swine Fever Virus, China, 2018. *Emerg*  
646 *Infect Dis* **24**, 2131-2133, doi:10.3201/eid2411.181274 (2018).
- 647 9 SS, S. & WR, H. Antibody response to inactivated preparations of African swine fever virus  
648 in pigs. *American journal of veterinary research* **28**, 6 (1967).
- 649 10 King, K. *et al.* Protection of European domestic pigs from virulent African isolates of African  
650 swine fever virus by experimental immunisation. *Vaccine* **29**, 4593-4600,  
651 doi:10.1016/j.vaccine.2011.04.052 (2011).
- 652 11 Reis, A. L. *et al.* Deletion of the African Swine Fever Virus Gene DP148R Does Not Reduce  
653 Virus Replication in Culture but Reduces Virus Virulence in Pigs and Induces High Levels of  
654 Protection against Challenge. *Journal of virology* **91**, doi:UNSP  
655 e01428-1710.1128/JVI.01428-17 (2017).
- 656 12 Escribano, J. M., Galindo, I. & Alonso, C. Antibody-mediated neutralization of African swine  
657 fever virus: Myths and facts. *Virus research* **173**, 101-109, doi:10.1016/j.virusres.2012.10.012  
658 (2013).
- 659 13 P, G.-P. *et al.* Neutralizing antibodies to different proteins of African swine fever virus inhibit  
660 both virus attachment and internalization. *Journal of virology* **70**, 6 (1996).
- 661 14 Kessler, C. *et al.* The intracellular proteome of African swine fever virus. *Scientific reports* **8**,  
662 doi:Artn 1471410.1038/S41598-018-32985-Z (2018).
- 663 15 A, A., T, M., M, G. & G, A. A proteomic atlas of the African swine fever virus particle.  
664 *Journal of virology*, doi:10.1128/JVI.01293-18 (2018).
- 665 16 Chapman, D. A., Tcherepanov, V., Upton, C. & Dixon, L. K. Comparison of the genome  
666 sequences of non-pathogenic and pathogenic African swine fever virus isolates. *The Journal*  
667 *of general virology* **89**, 397-408, doi:10.1099/vir.0.83343-0 (2008).
- 668 17 de Villiers, E. P. *et al.* Phylogenomic analysis of 11 complete African swine fever virus  
669 genome sequences. *Virology* **400**, 128-136, doi:10.1016/j.virol.2010.01.019 (2010).
- 670 18 Fraczyk, M. *et al.* Evolution of African swine fever virus genes related to evasion of host  
671 immune response. *Veterinary microbiology* **193**, 133-144, doi:10.1016/j.vetmic.2016.08.018  
672 (2016).
- 673 19 Michaud, V., Randriamparany, T. & Albina, E. Comprehensive phylogenetic reconstructions  
674 of African swine fever virus: proposal for a new classification and molecular dating of the  
675 virus. *PloS one* **8**, e69662, doi:10.1371/journal.pone.0069662 (2013).
- 676 20 Wang, Y. *et al.* Origin and Possible Genetic Recombination of the Middle East Respiratory  
677 Syndrome Coronavirus from the First Imported Case in China: Phylogenetics and Coalescence  
678 Analysis. *mBio* **6**, e01280-01215, doi:10.1128/mBio.01280-15 (2015).
- 679 21 Nagy, P. D. & Bujarski, J. J. Homologous RNA recombination in brome mosaic virus:  
680 AU-rich sequences decrease the accuracy of crossovers. *Journal of virology* **70**, 415-426  
681 (1996).
- 682 22 Roossinck, M. J. Mechanisms of plant virus evolution. *Annual review of phytopathology* **35**,  
683 191-209, doi:10.1146/annurev.phyto.35.1.191 (1997).
- 684 23 Wikipedia. *Homologous recombination*,  
685 <[https://en.wikipedia.org/wiki/Homologous\\_recombination#In\\_viruses](https://en.wikipedia.org/wiki/Homologous_recombination#In_viruses)> (2018).
- 686 24 *YqaJ protein domain*, <[https://en.wikipedia.org/wiki/YqaJ\\_protein\\_domain](https://en.wikipedia.org/wiki/YqaJ_protein_domain)> (2018).
- 687 25 Bajrai, L. H. *et al.* Kaumobavirus, a New Virus That Clusters with Faustoviruses and

- 688 Asfarviridae. *Viruses-Basel* **8**, doi:Artn 27810.3390/V8110278 (2016).
- 689 26 Andreani, J. *et al.* Pacmanvirus, a New Giant Icosahedral Virus at the Crossroads between  
690 Asfarviridae and Faustoviruses. *Journal of virology* **91**, doi:UNSP  
691 e0021210.1128/JVI.00212-17 (2017).
- 692 27 de Oliveira, V. L. *et al.* A novel TLR3 inhibitor encoded by African swine fever virus (ASFV).  
693 *Archives of virology* **156**, 597-609, doi:10.1007/s00705-010-0894-7 (2011).
- 694 28 Ruiz-Gonzalvo, F., Rodriguez, F. & Escribano, J. M. Functional and immunological  
695 properties of the baculovirus-expressed hemagglutinin of African swine fever virus. *Virology*  
696 **218**, 285-289, doi:10.1006/viro.1996.0193 (1996).
- 697 29 Elde, N. C. *et al.* Poxviruses Deploy Genomic Accordions to Adapt Rapidly against Host  
698 Antiviral Defenses. *Cell* **150**, 831-841, doi:10.1016/j.cell.2012.05.049 (2012).
- 699 30 TG, B., Z, L., JG, N., DL, R. & L, Z. African swine fever virus multigene family 360 genes  
700 affect virus replication and generalization of infection in *Ornithodoros porcinus* ticks. *Journal*  
701 *of virology* **78**, 9 (2004).
- 702 31 Zhang, J. Z. Evolution by gene duplication: an update. *Trends in Ecology & Evolution* **18**,  
703 292-298, doi:10.1016/S0169-5347(03)00033-8 (2003).
- 704 32 Freitas-Junior, L. H. *et al.* Frequent ectopic recombination of virulence factor genes in  
705 telomeric chromosome clusters of *P-falciparum*. *Nature* **407**, 1018-1022, doi:Doi  
706 10.1038/35039531 (2000).
- 707 33 Agarwala, R. *et al.* Database resources of the National Center for Biotechnology Information.  
708 *Nucleic Acids Res* **44**, D7-D19, doi:10.1093/nar/gkv1290 (2016).
- 709 34 Katoh, K. & Standley, D. M. MAFFT multiple sequence alignment software version 7:  
710 improvements in performance and usability. *Molecular biology and evolution* **30**, 772-780,  
711 doi:10.1093/molbev/mst010 (2013).
- 712 35 Larkin, M. A. *et al.* Clustal W and Clustal X version 2.0. *Bioinformatics* **23**, 2947-2948,  
713 doi:10.1093/bioinformatics/btm404 (2007).
- 714 36 Altschul, S. F., Gish, W., Miller, W., Myers, E. W. & Lipman, D. J. Basic local alignment  
715 search tool. *Journal of molecular biology* **215**, 403-410 (1990).
- 716 37 Emms, D. M. & Kelly, S. OrthoFinder: solving fundamental biases in whole genome  
717 comparisons dramatically improves orthogroup inference accuracy. *Genome biology* **16**, 157,  
718 doi:10.1186/s13059-015-0721-2 (2015).
- 719 38 Yang, Z. H. PAML 4: Phylogenetic analysis by maximum likelihood. *Molecular biology and*  
720 *evolution* **24**, 1586-1591, doi:10.1093/molbev/msm088 (2007).
- 721 39 Quevillon, E. *et al.* InterProScan: protein domains identifier. *Nucleic Acids Res* **33**, W116-120,  
722 doi:10.1093/nar/gki442 (2005).
- 723 40 Krogh, A., Larsson, B., von Heijne, G. & Sonnhammer, E. L. Predicting transmembrane  
724 protein topology with a hidden Markov model: application to complete genomes. *Journal of*  
725 *molecular biology* **305**, 567-580, doi:10.1006/jmbi.2000.4315 (2001).
- 726 41 Martin, D. & Rybicki, E. RDP: detection of recombination amongst aligned sequences.  
727 *Bioinformatics* **16**, 562-563 (2000).
- 728 42 Finn, R. D. *et al.* The Pfam protein families database: towards a more sustainable future.  
729 *Nucleic Acids Res* **44**, D279-D285, doi:10.1093/nar/gkv1344 (2016).
- 730 43 *Repbase*, <<https://girinst.org/>> (2018).
- 731 44 Wicker, T. *et al.* A unified classification system for eukaryotic transposable elements. *Nature*

- 732            *Reviews Genetics* **8**, 973-982, doi:10.1038/nrg2165 (2007).
- 733    45    Tamura, K., Stecher, G., Peterson, D., Filipski, A. & Kumar, S. MEGA6: Molecular  
734            Evolutionary Genetics Analysis version 6.0. *Molecular biology and evolution* **30**, 2725-2729,  
735            doi:10.1093/molbev/mst197 (2013).
- 736    46    Huson, D. H. *et al.* Dendroscope: An interactive viewer for large phylogenetic trees. *Bmc*  
737            *Bioinformatics* **8**, 460, doi:10.1186/1471-2105-8-460 (2007).
- 738    47    R Core Team, *R: A language and environment for statistical computing*. *R Foundation for*  
739            *Statistical Computing, Vienna, Austria*, <<https://www.R-project.org/>> (2018).
- 740
